# Supplementary material
Source: publisher figshare collection journal article supplement (https://acs.figshare.com/ndownloader/files/23136341)
Supplement: Supplementary file 1 [file 23136341]

## Supporting Information

# Textile Based Capacitive Sensor for Physical Rehabilitation *via* Surface Topological Modification

Liming Chen<sup>a</sup>, Mingyang Lu<sup>a</sup>, Haosen Yang<sup>c</sup>, Jorge Ricardo Salas Avila<sup>a</sup>, Bowen Shi<sup>b</sup>, Lei Ren<sup>c</sup>, Guowu Wei<sup>d</sup>, Xuqing Liu<sup>b,\*</sup>, Wuliang Yin<sup>a,\*</sup>

<sup>a</sup> Department of Electrical and Electronic Engineering, University of Manchester, Sackville Street Building, Manchester M13 9PL, United Kingdom.

<sup>b</sup> Department of Materials, University of Manchester, Sackville Street Building, Manchester M13 9PL, United Kingdom.

<sup>c</sup> Department of Mechanical, Aerospace and Civil Engineering, University of Manchester, Sackville Street Building, Manchester M13 9PL, United Kingdom.

<sup>d</sup> School of Computing, Science and Engineering, University of Salford, Salford, M5 4WT, United Kingdom.

\*E-mail: [xuqing.liu@manchester.ac.uk](mailto:xuqing.liu@manchester.ac.uk); [wuliang.yin@manchester.ac.uk](mailto:wuliang.yin@manchester.ac.uk)

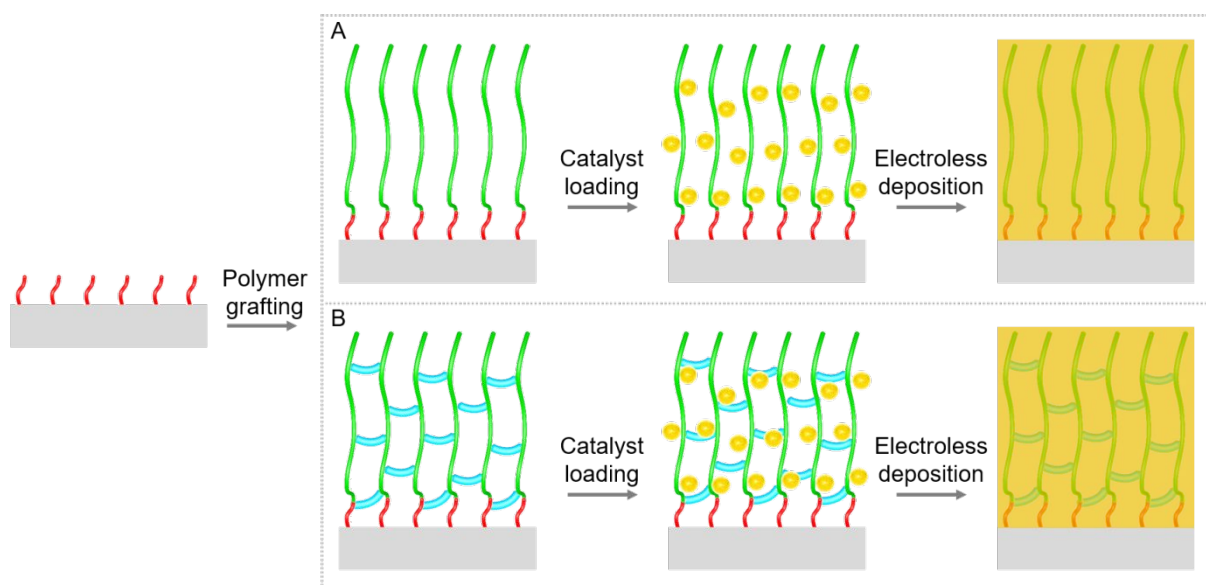

**Figure S1.** Schematic illustration of the PAMD fabrication, (A) traditional surface-grafted polymer, (B) topologies adhesion of polymer network in this work.

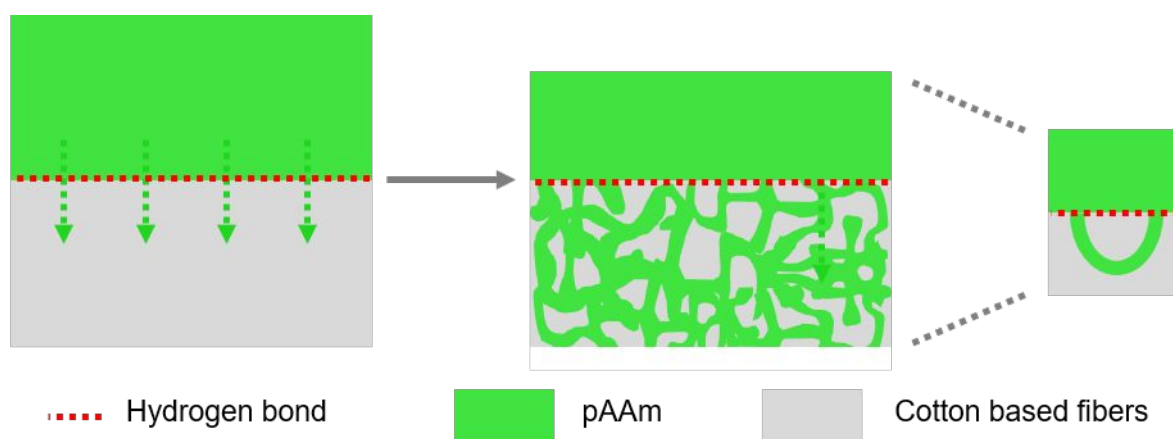

**Figure S2.** Macroscopic topologies of pAAm adhesion into cotton fibers, (1) thread-hole topology formed between the pAAm and the fibers, (2) bond topology through hydrogen bond formed between amine groups of the pAAm and hydroxyl groups of the fibers.

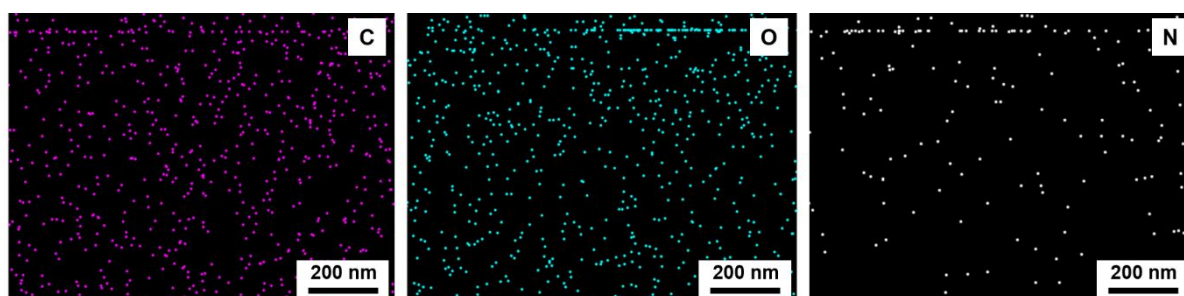

**Figure S3.** EDS mapping images for carbon, oxygen and nitrogen.

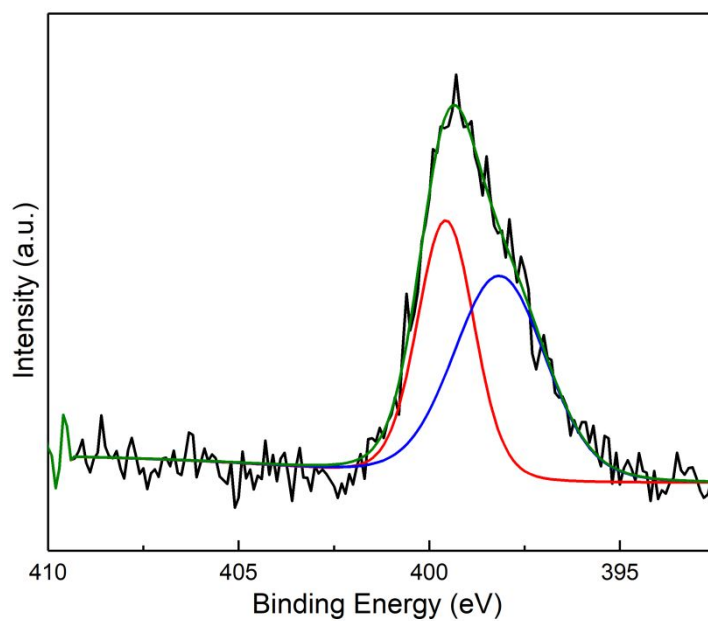

**Figure S4.** The XPS N 1S spectrum of Pd ion-based fabric.

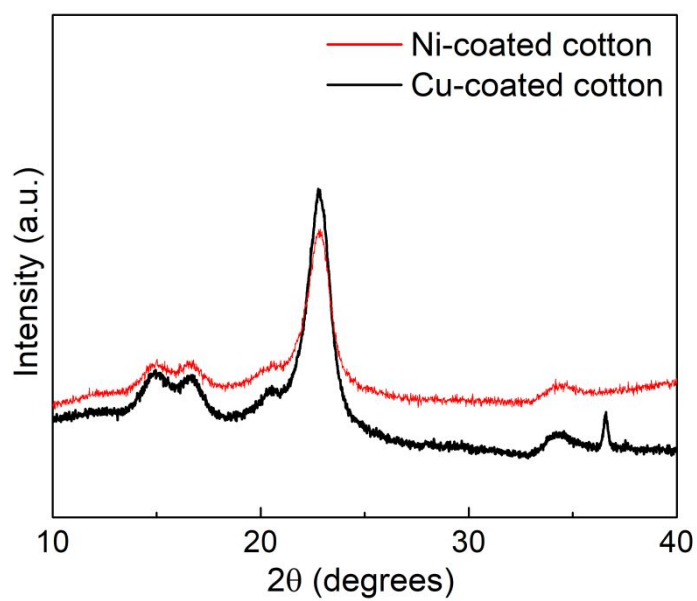

**Figure S5.** XRD spectrum (10-40 degrees) of (red line) nickel-coated fabric and (black line) copper-coated fabric.

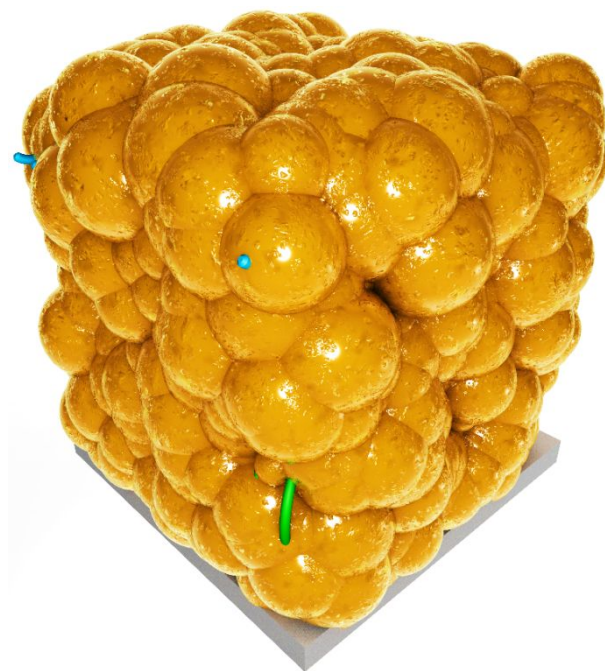

**Figure S6.** The final state of nickel nanoparticle on the surface of cotton fibers after ELD process.

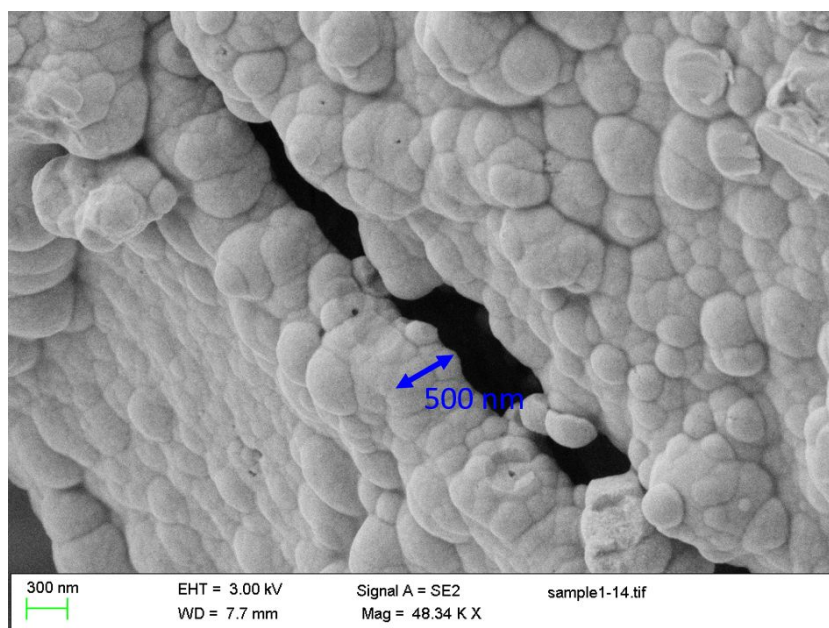

**Figure S7.** Representative SEM image of the obtained nickel-coated conductive fabrics.

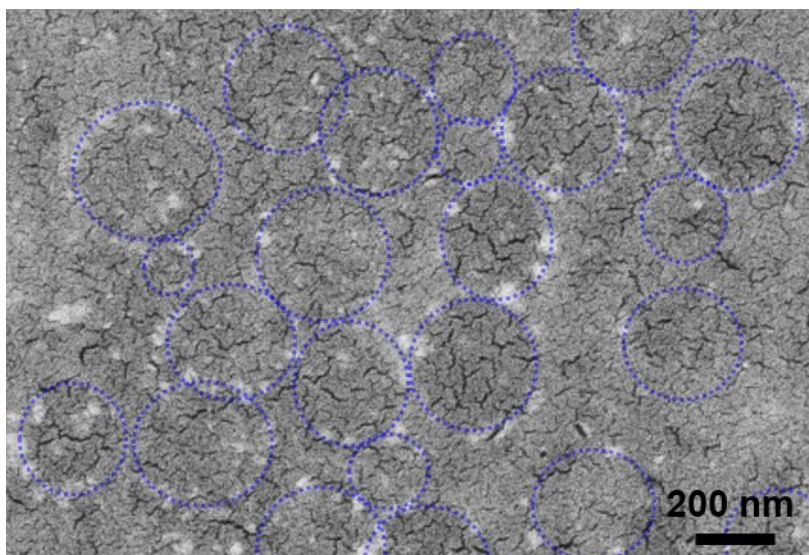

**Figure S8.** Representative SEM image of the nickel-coated conductive fabrics prepared by 5 min ELD.

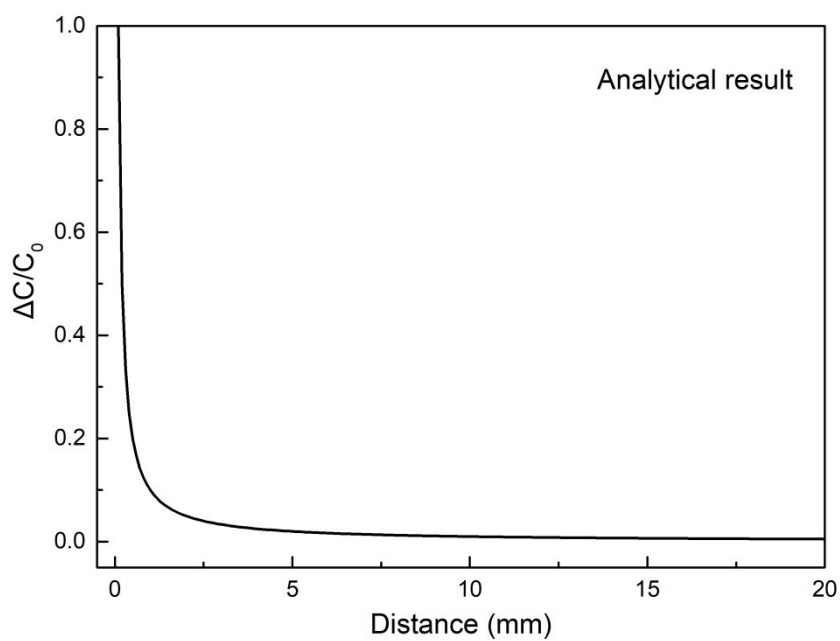

**Figure S9.** Analytical result for the capacitance changes of conductive sensor as functions of distance.

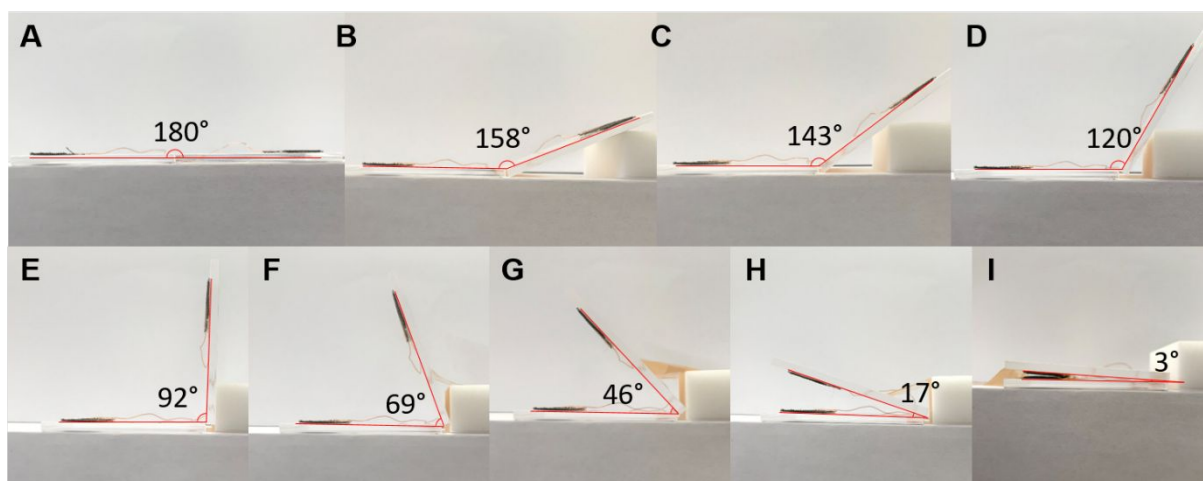

**Figure S10.** The photos of bending angles measurement.

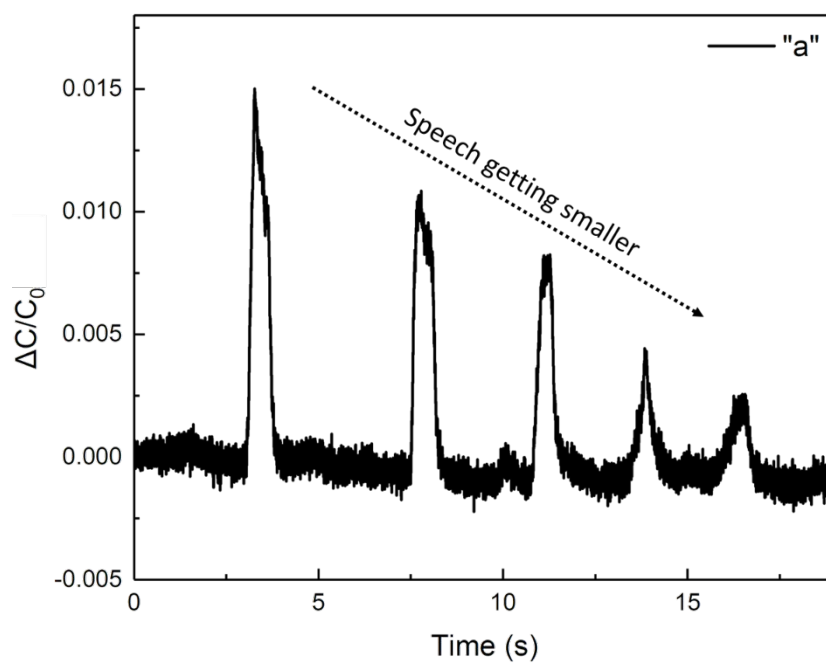

**Figure S11.** The changes of capacitance as the speech getting smaller.

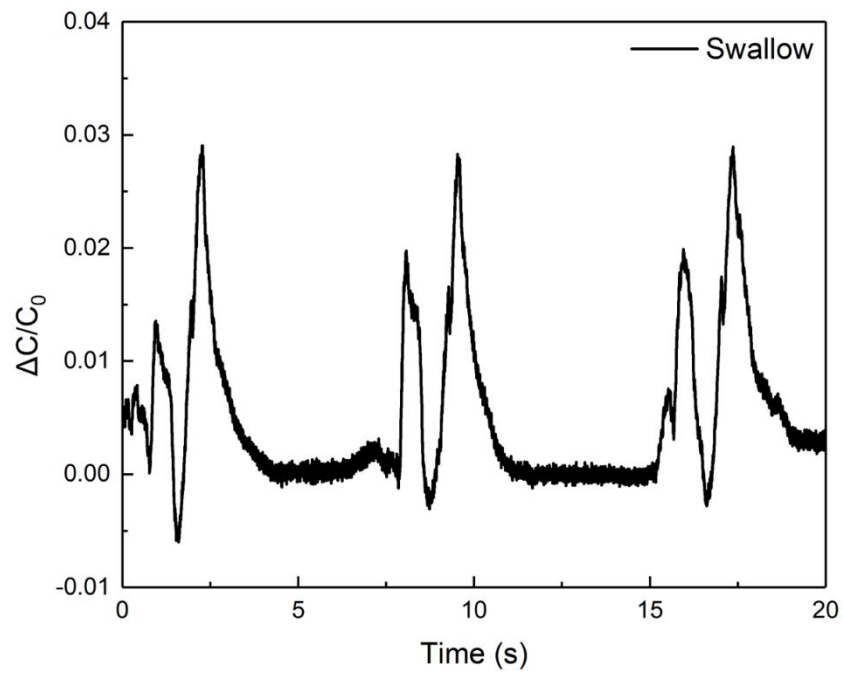

**Figure S12.** The changes of capacitance as swallowing.

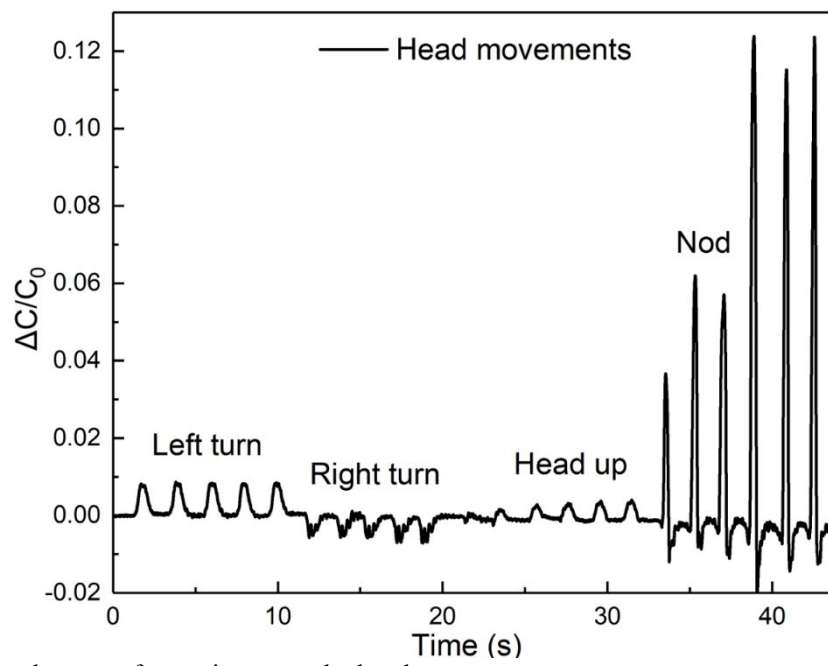

**Figure S13.** The changes of capacitance as the head movement.

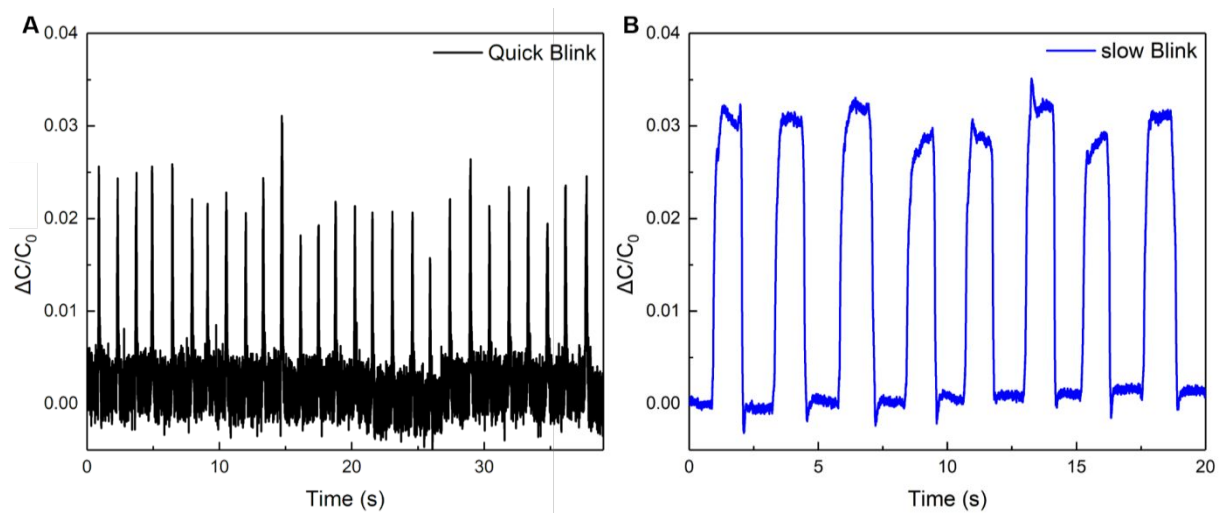

**Figure S14.** The changes of capacitance as fast and slow blink.

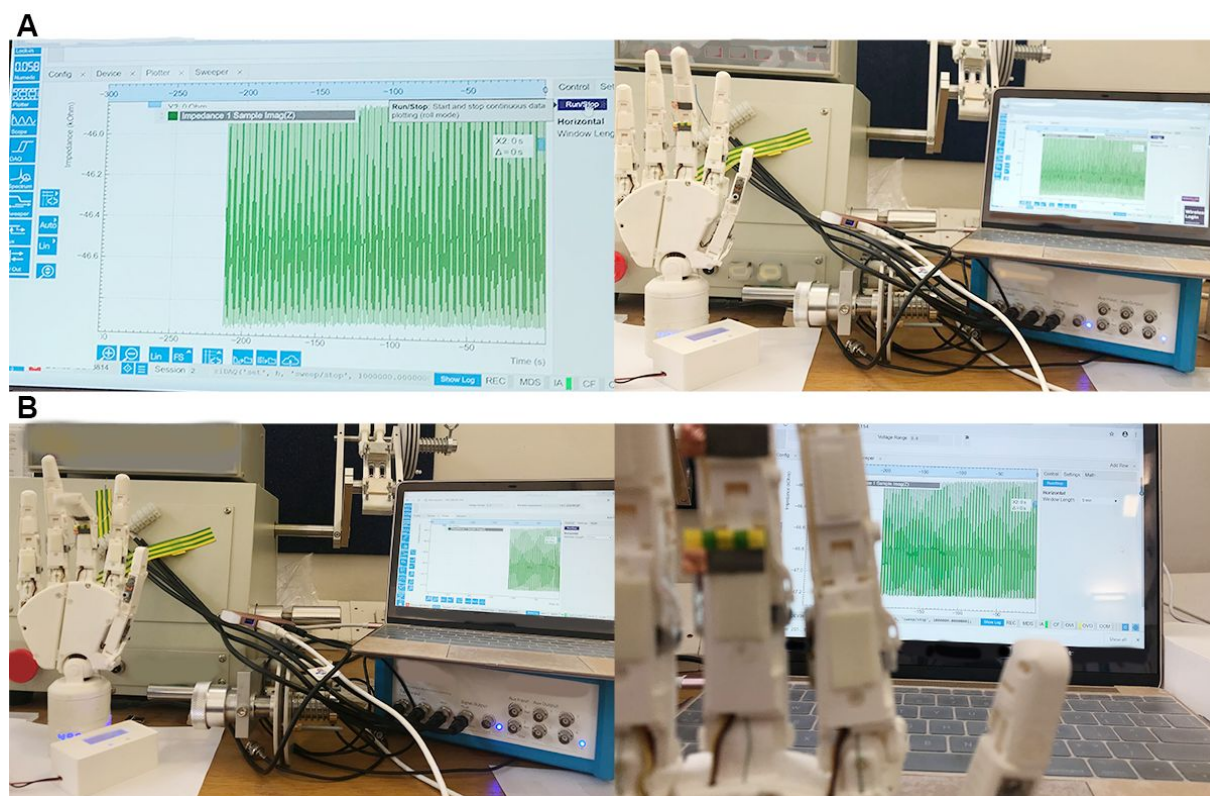

**Figure S15.** Experimental photos of the repeated finger bending of a MCR-Hand for the test of stability and durability of the sensor.

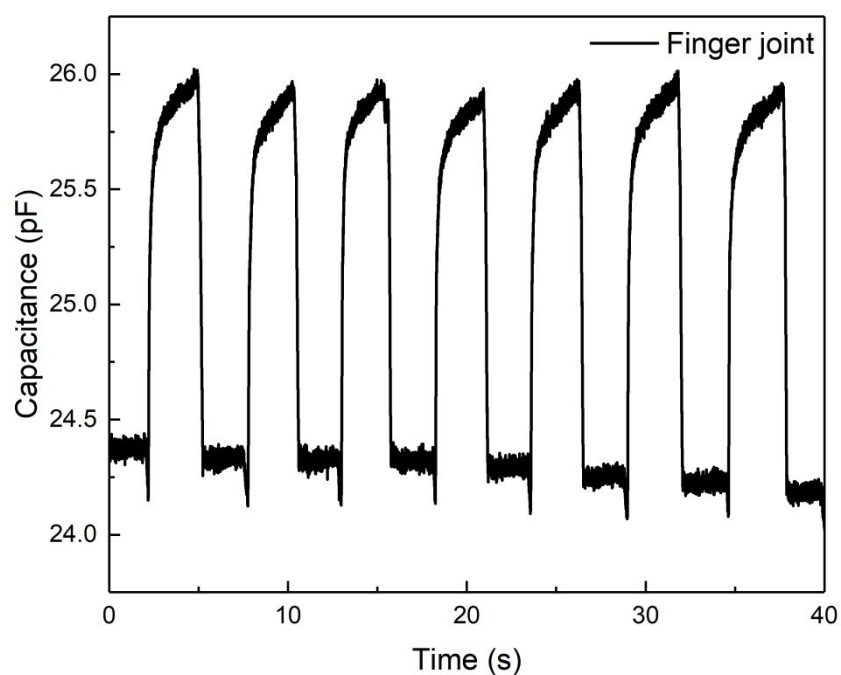

**Figure S16.** The changes of capacitance absolute value as finger joint bending activities.

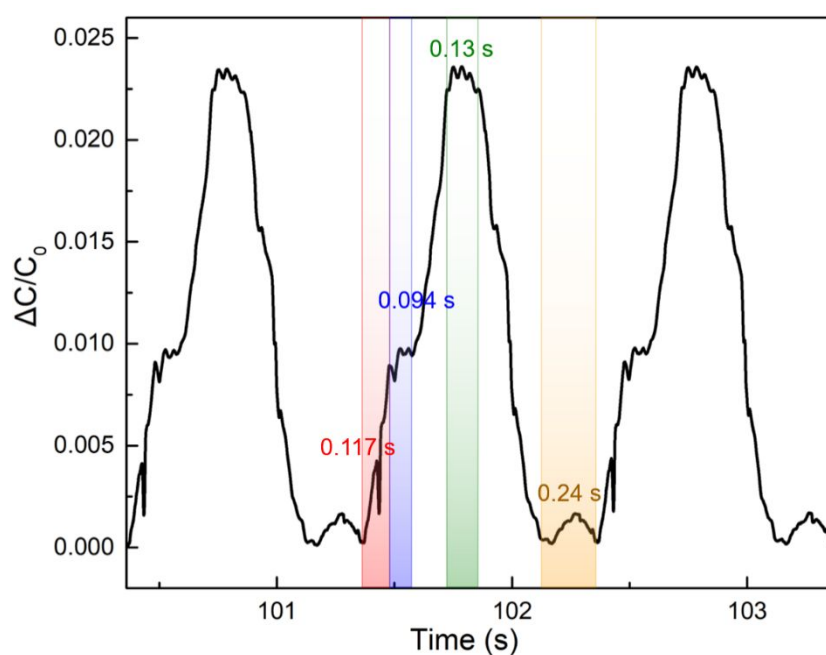

**Figure S17.** Three cycles of capacitance changes of MCR-Hand finger bending in **Figure 8**.

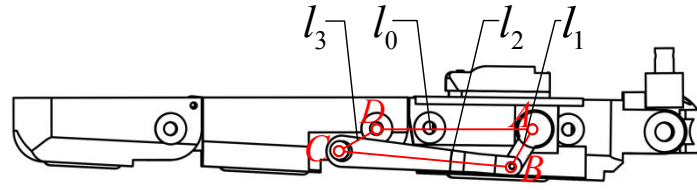

**Figure S18.** The four-bar mechanism of DIP joint.

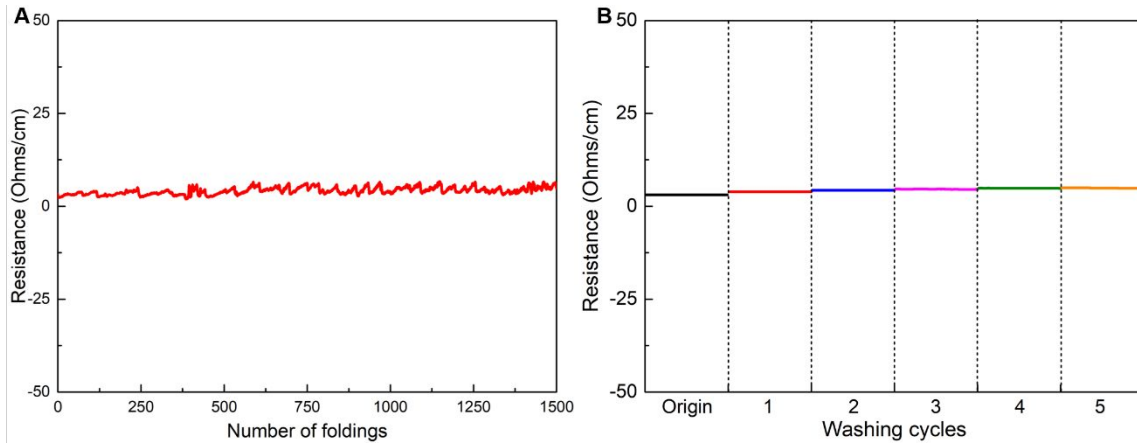

**Figure S19.** Electrical resistance changes of the prepared conductive nickel-coated fabric for (A) 1500 cycles of folding test, and (B) 5 cycles of washing ability test.

**Table S1.** Properties of different flexible textile-based sensor reported in the literature.

| Ref. | Conductive component                   | Fabrication strategy                       | Cost | Conductivity      | Sensing Mechanism | Sensitivity                           | Response time |
|------|----------------------------------------|--------------------------------------------|------|-------------------|-------------------|---------------------------------------|---------------|
| 1    | Graphene                               | Microfluidic spinning                      | Low  | 0.5 k $\Omega$    | Resistance        | $\Delta R/R_0=1.5$ under 10% strain   |               |
| 2    | Silver nanowire (AgNW)                 | Screening printing                         | High |                   | Capacitance       | 1.62 MPa <sup>-1</sup> (~1.8 $\mu$ m) | 40 ms         |
| 3    | Eutectic gallium–indium (eGaIn)        | Injection                                  | Low  |                   | Capacitance       | Tunable                               | 75 ms         |
| 4    | Silica standard multimode fibers fiber | plane-polished with polymer buffer coating | Low  |                   | Light intensity   | 1.80°                                 |               |
| 5    | Carbon nanotubes (CNTs)                | Spray coating                              | Low  | 30 -50 k $\Omega$ | Resistance        | 0.14 rad <sup>-1</sup>                |               |

|                  |                                                                                                                                                                      |                                                                |      |                         |                            |                                 |        |
|------------------|----------------------------------------------------------------------------------------------------------------------------------------------------------------------|----------------------------------------------------------------|------|-------------------------|----------------------------|---------------------------------|--------|
| <b>6</b>         | Single-walled carbon nanotubes (SWCNTs)-filled binary polymer of poly vinylidene fluoride/poly (3,4-ethylenedioxythiophene)-poly (styrenesulfonate) (PVDF/PEDOT:PSS) | Applicator Coating on PET substrate                            | High | 5.8 M $\Omega$          | Impedance                  | 90 k $\Omega$ / $^{\circ}$      | ~2 s   |
| <b>7</b>         | Aluminum                                                                                                                                                             | Hot embossing technique                                        | Low  |                         | Capacitance                | 1.15 mm                         | 14 ms  |
| <b>8</b>         | Reduced graphene oxide (rGO)                                                                                                                                         | Mixing, directional freezing, freeze-drying, and carbonization | Low  | 199 $\Omega$            | Resistance                 | 0.052 $^{\circ}$                |        |
| <b>9</b>         | Aluminum and silver                                                                                                                                                  | Sputtering technology                                          | High |                         | Resistance and capacitance |                                 | 164 ms |
| <b>This work</b> | Nickel/Copper                                                                                                                                                        | Electroless deposition                                         | Low  | 3-5 $\Omega$ cm $^{-1}$ | Capacitance                | 0.2 $\mu$ m and 0.05 $^{\circ}$ | 5 us   |

## Reference

- (1) Hu, X.; Tian, M.; Xu, T.; Sun, X.; Sun, B.; Sun, C.; Liu, X.; Zhang, X.; Qu, L. Multiscale Disordered Porous Fibers for Self-Sensing and Self-Cooling Integrated Smart Sportswear. *ACS Nano* **2020**, *14*, 559–567.
- (2) Yao, S.; Zhu, Y. Wearable Multifunctional Sensors Using Printed Stretchable Conductors Made of Silver Nanowires. *Nanoscale* **2014**, *6*, 2345–2352.
- (3) Yu, L.; Feng, Y.; Tamil Selven, D. S/OM; Yao, L.; Soon, R. H.; Yeo, J. C.; Lim, C. T. Dual-Core Capacitive Microfiber Sensor for Smart Textile Applications. *ACS Appl. Mater. Interfaces* **2019**, *11*, 33347–33355.
- (4) Fujiwara, E.; Dos Santos, M. F. M.; Suzuki, C. K. Flexible Optical Fiber Bending Transducer for Application in Glove-Based Sensors. *IEEE Sens. J.* **2014**, *14*, 3631–3636.
- (5) Sahoo, B. N.; Woo, J.; Algadi, H.; Lee, J.; Lee, T. Superhydrophobic, Transparent, and Stretchable 3D Hierarchical Wrinkled Film-Based Sensors for Wearable Applications. *Adv. Mater. Technol.* **2019**, *4*, 1900230.
- (6) Aziz, S.; Chang, S.-H. Smart-Fabric Sensor Composed of Single-Walled Carbon Nanotubes Containing Binary Polymer Composites for Health Monitoring. *Compos. Sci. Technol.* **2018**, *163*, 1–9.
- (7) Sadeghi, A.; Mondini, A.; Totaro, M.; Mazzolai, B.; Beccai, L. A Wearable Sensory Textile-Based Clutch with High Blocking Force. *Adv. Eng. Mater.* **2019**, *21*, 1900886.
- (8) Zhuo, H.; Hu, Y.; Tong, X.; Chen, Z.; Zhong, L.; Lai, H.; Liu, L.; Jing, S.; Liu, Q.; Liu, C.; Peng, X.; Sun, R. A Supercompressible, Elastic, and Bendable Carbon Aerogel with Ultrasensitive Detection Limits for Compression Strain, Pressure, and Bending Angle. *Adv. Mater.* **2018**, *30*, 1706705.
- (9) Atalay, O.; Atalay, A.; Gafford, J.; Wang, H.; Wood, R.; Walsh, C. A Highly Stretchable Capacitive-Based Strain Sensor Based on Metal Deposition and Laser Rastering. *Adv. Mater. Technol.* **2017**, *2*, 1700081.
